# Supplementary material for: PALS: peer support for community dwelling older people with chronic low back pain: a feasibility and acceptability study
Source: PubMed Central journal article supplement (PMC7029274; doi:10.1016/j.physio.2019.01.015), 2020-03
Supplement: mmc1.pdf [file mmc1.pdf]

## Supplementary File 1: Content of PALS Intervention

| Session | Topic                                           | Description                                                                                    |
|---------|-------------------------------------------------|------------------------------------------------------------------------------------------------|
| 1       | Living with persistent low back pain            | Exploring functional, social & emotional aspects of living with CLBP                           |
| 2       | Exercise & Physical Activity                    | Exploring the role of physical activity for CLBP and opportunities for being physically active |
| 3       | Adhering to self-management strategies          | Exploring self-management strategies for CLBP                                                  |
| 4       | Goal setting & action –planning                 | Exploring how to put things into action                                                        |
| 5       | Problem-solving & flare-ups                     | Exploring problem-solving and what to do in the event of a flare-up                            |
| 6       | Review and ending the peer support relationship | Preparing for longer-term self-management                                                      |
