# Supplementary material for: PALS: peer support for community dwelling older people with chronic low back pain: a feasibility and acceptability study
Source: PubMed Central journal article supplement (PMC7029274; doi:10.1016/j.physio.2019.01.015), 2020-03
Supplement: mmc2.pdf [file mmc2.pdf]

## Supplementary file 2: Interview Topic Guide

| Main Topic                                 | Example prompts used                                                                                                                                                                                                                                                                                                                |
|--------------------------------------------|-------------------------------------------------------------------------------------------------------------------------------------------------------------------------------------------------------------------------------------------------------------------------------------------------------------------------------------|
| <b>People with CLBP</b>                    |                                                                                                                                                                                                                                                                                                                                     |
| Expectations                               | How they found out about study<br>Had they heard of peer support previously<br>What did they expect to happen/what did happen                                                                                                                                                                                                       |
| Study completion                           | What did they think of matching process<br>How many sessions were attended                                                                                                                                                                                                                                                          |
| The intervention                           | Mode of delivery<br>What they did/discussed during the sessions<br>What they thought of the sessions<br>What they thought of the manual<br>What they thought of the ending process                                                                                                                                                  |
| Influence on low back pain self-management | Was the intervention helpful/not helpful for them<br>Would they recommend to others with low back pain<br>What could be done differently<br>Any ideas on when & how to introduce peer support to a patient journey                                                                                                                  |
| Study Processes                            | What did they think of the forms (data collection forms/outcome measures)<br>What did they think of the support from the research team                                                                                                                                                                                              |
| Future Study                               | If this had been an RCT would they have taken part                                                                                                                                                                                                                                                                                  |
| Anything else                              | Anything else they would like to reflect on                                                                                                                                                                                                                                                                                         |
| <b>Peer Support Volunteers</b>             |                                                                                                                                                                                                                                                                                                                                     |
| Expectations                               | How they found out about study<br>Had they heard of peer support previously<br>What did they expect to happen/what did happen                                                                                                                                                                                                       |
| Intervention                               | How many people they supported<br>What did they think of matching process<br>What did they think of resources<br>How did they conduct the intervention<br>What did they do/discuss during sessions<br>What did they think was effective/not effective<br>What did they think of the manual<br>Has it affected their self-management |
| Study processes                            | What did they think of support provided by research team<br>What did they think of paperwork                                                                                                                                                                                                                                        |
| Anything else                              | Anything else they would like to reflect on                                                                                                                                                                                                                                                                                         |
