# Supplementary material for: PALS: peer support for community dwelling older people with chronic low back pain: a feasibility and acceptability study
Source: PubMed Central journal article supplement (PMC7029274; doi:10.1016/j.physio.2019.01.015), 2020-03
Supplement: mmc3.pdf [file mmc3.pdf]

### Supplementary File 3: Results of Satisfaction Questionnaire (n=8)

| Satisfaction with:                                                    | Satisfied | Dissatisfied | Neutral |
|-----------------------------------------------------------------------|-----------|--------------|---------|
| Information I was provided with before the intervention started       | 5         | 0            | 2       |
| Information I was provided with during the course of the intervention | 6         | 0            | 1       |
| Matching with the peer support volunteer                              | 6         | 0            | 1       |
| Communication with the peer support volunteer                         | 5         | 0            | 2       |
| Communication with the project co-ordinator                           | 5         | 1            | 1       |
| Support I received from the peer support volunteer                    | 5         | 0            | 2       |
| Support I received from the project co-ordinator                      | 4         | 1            | 2       |
| Ending the peer support relationship                                  | 6         | 0            | 1       |

Note: All items presented as 5-point Likert scales; "Very satisfied" and "satisfied" are combined here as "satisfied"; "very dissatisfied" and "dissatisfied" are combined here as "dissatisfied"
